# Supplementary material for: Identifying and Seeing beyond Multiple Sequence Alignment Errors Using Intra-Molecular Protein Covariation
Source: PubMed Central journal article supplement (PMC2893159; doi:10.1371/journal.pone.0011082), 2010-06-28

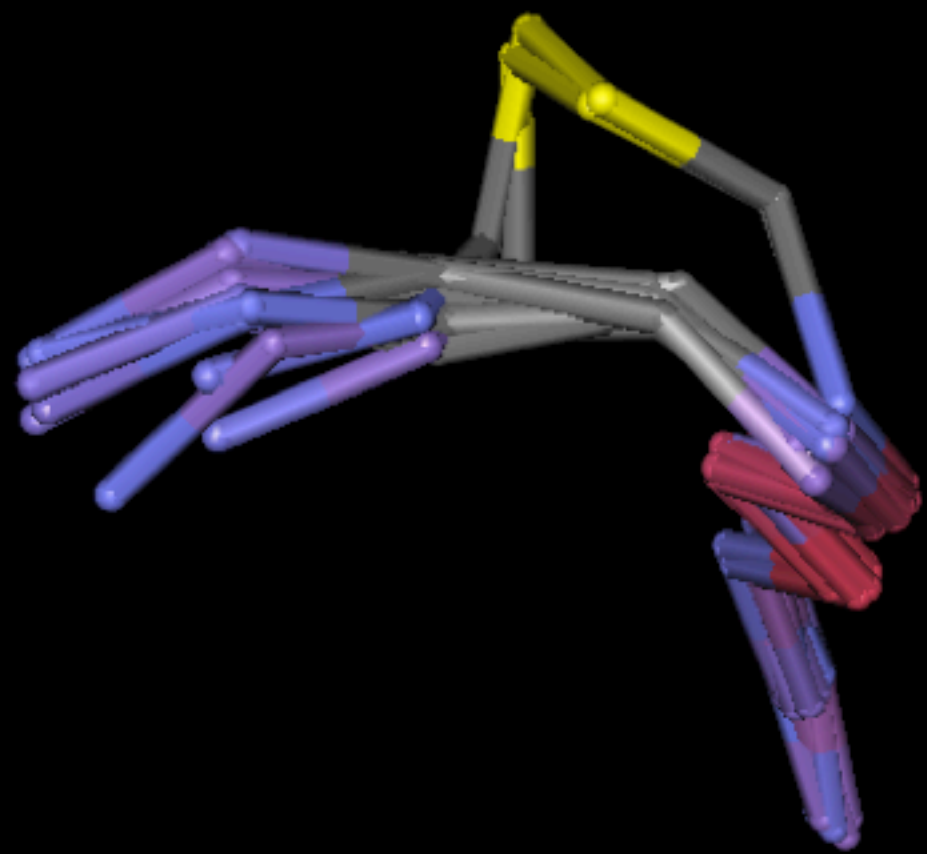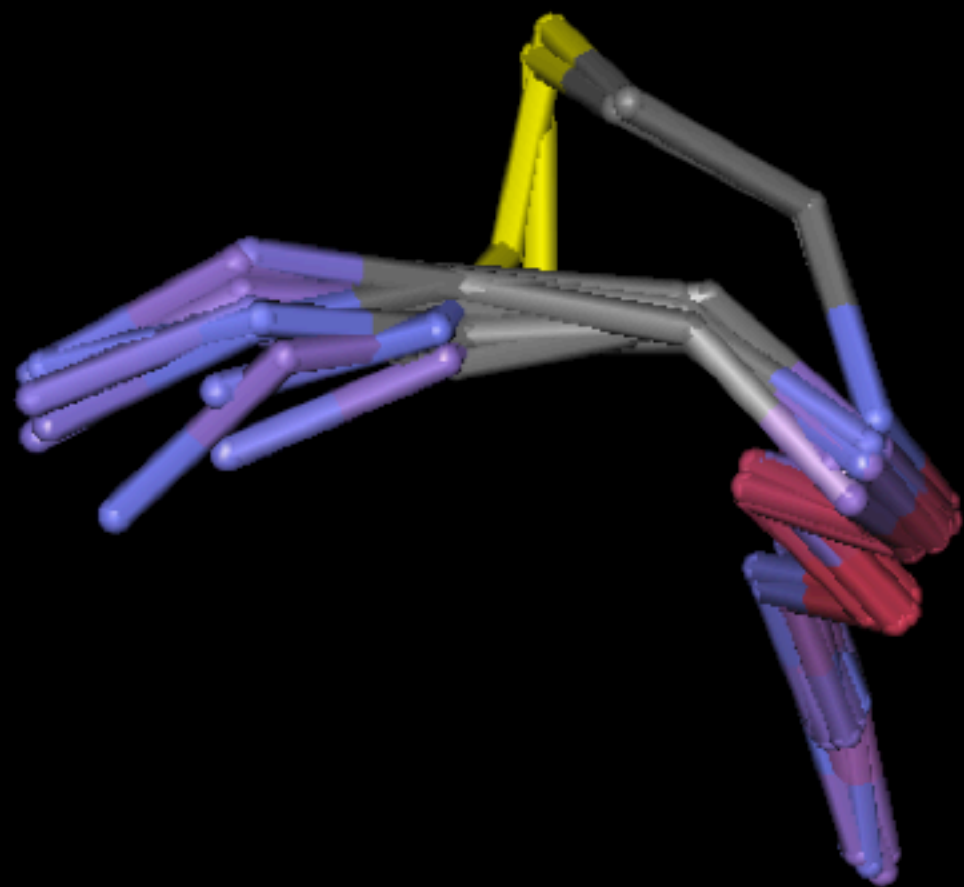

Supplement: pone.0011082.s003.pdf [file pone.0011082.s003.pdf]
