# Supplementary material for: Identifying and Seeing beyond Multiple Sequence Alignment Errors Using Intra-Molecular Protein Covariation
Source: PubMed Central journal article supplement (PMC2893159; doi:10.1371/journal.pone.0011082), 2010-06-28
Supplement: pone.0011082.s004.pdf [file pone.0011082.s004.pdf]

| alignment  | number of windows $\geq 2.5$ |
|------------|------------------------------|
| cd00688    | 22                           |
| pfam07992  | 9                            |
| cd01288    | 8                            |
| cd02889    | 23                           |
| cd00418    | 13                           |
| cd00267    | 10                           |
| cd04322    | 6                            |
| cd00812    | 5                            |
| pfam00501  | 5                            |
| cd02750    | 6                            |
| cd01991    | 5                            |
| cd00751    | 16                           |
| cd00807    | 7                            |
| cd01337    | 36                           |
| cd00817    | 32                           |
| COG0124    | 5                            |
| cd03586    | 6                            |
| cd00046    | 5                            |
| cd04317    | 10                           |
| cd00347    | 8                            |
| pfam03063  | 5                            |
| pfam00310  | 8                            |
| cd01596    | 20                           |
| cd03747    | 8                            |
| pfam00152  | 7                            |
| cd01339    | 30                           |
| cd01967    | 5                            |
| smart00642 | 7                            |
| cd00300    | 33                           |
| pfam00753  | 15                           |
| cd00672    | 21                           |
| pfam00702  | 10                           |
| cd02023    | 7                            |
| cd00818    | 29                           |
| cd00802    | 19                           |
| cd01594    | 7                            |
| cd00771    | 5                            |
| cd00808    | 5                            |
| cd01359    | 5                            |
| cd01914    | 5                            |
| cd03228    | 18                           |
| cd02933    | 16                           |
| cd00145    | 14                           |
| cd01653    | 10                           |
