# Supplementary material for: Identifying and Seeing beyond Multiple Sequence Alignment Errors Using Intra-Molecular Protein Covariation
Source: PubMed Central journal article supplement (PMC2893159; doi:10.1371/journal.pone.0011082), 2010-06-28
Supplement: pone.0011082.s005.pdf [file pone.0011082.s005.pdf]

| gi       | annotation                           | reason for removal               |
|----------|--------------------------------------|----------------------------------|
| 987693   | lactate dehydrogenase                | have to force global alignment   |
| 15899314 | lactate dehydrogenase                | have to force global alignment   |
| 16803097 | hypothetical (mdh/ldh like)          | does not match ungapped segments |
| 17367527 | probable malate dehydrogenase        | paralogous sequence              |
| 17367610 | probable malate dehydrogenase        | paralogous sequence              |
| 29826879 | lactate dehydrogenase                | partial sequence                 |
| 33860171 | lactate dehydrogenase                | have to force global alignment   |
| 38233041 | putative lactate dehydrogenase       | have to force global alignment   |
| 47217234 | unnamed protein product              | no match at N terminus           |
| 54020211 | hypothetical protein (mdh/ldh- like) | have to force global alignment   |
| 58337781 | lactate dehydrogenase                | have to force global alignment   |
| 70606086 | lactate/malate dehydrogenase         | have to force global alignment   |
| 92089264 | has been removed from database       | have to force global alignment   |
