# Supplementary material for: Identifying and Seeing beyond Multiple Sequence Alignment Errors Using Intra-Molecular Protein Covariation
Source: PubMed Central journal article supplement (PMC2893159; doi:10.1371/journal.pone.0011082), 2010-06-28
Supplement: pone.0011082.s006.pdf [file pone.0011082.s006.pdf]

|              | 50%  | $\bar{N}_{50\%}$ | 60%  | $\bar{N}_{60\%}$ | 70%  | $\bar{N}_{70\%}$ | 80%  | $\bar{N}_{80\%}$ | 90%  | $\bar{N}_{90\%}$ |
|--------------|------|------------------|------|------------------|------|------------------|------|------------------|------|------------------|
| $\Delta Z_p$ | 1.28 | 18.47            | 1.73 | 13.75            | 2.43 | 10.39            | 2.91 | 7.79             | 3.58 | 5.46             |
| $Z_p$        | 3.07 | 17.44            | 3.59 | 11.98            | 4.12 | 8.76             | 4.63 | 6.64             | 5.14 | 4.42             |
| $Z_{px}$     | 2.59 | 22.05            | 2.89 | 16.48            | 3.26 | 12.5             | 3.63 | 9.06             | 3.94 | 6.57             |
