# Supplementary material for: Identifying and Seeing beyond Multiple Sequence Alignment Errors Using Intra-Molecular Protein Covariation
Source: PubMed Central journal article supplement (PMC2893159; doi:10.1371/journal.pone.0011082), 2010-06-28
Supplement: pone.0011082.s007.pdf [file pone.0011082.s007.pdf]

---

|           |            |           |            |
|-----------|------------|-----------|------------|
| cd00338   | pfam00239  | cd00311   | cd00105    |
| cd00198   | cd02039    | pfam00092 | cd04496    |
| pfam00027 | cd00158    | pfam00665 | cd00882    |
| cd00291   | cd05380    | pfam00104 | cd00096    |
| cd02961   | cd04100    | cd01876   | pfam01627  |
| COG0589   | cd00086    | cd00082   | cd00063    |
| cd00208   | cd00037    | pfam04055 | pfam07714  |
| cd04371   | pfam02826  | cd00043   | cd00751    |
| cd00352   | cd04724    | pfam03466 | cd00668    |
| cd00446   | pfam00004  | cd03442   | cd04730    |
| cd02980   | cd00293    | cd00382   | pfam02210  |
| cd03586   | cd00591    | cd00636   | cd00154    |
| cd00570   | smart00034 | cd02966   | cd00204    |
| cd02801   | pfam02502  | cd00254   | cd00448    |
| cd01182   | pfam00570  | cd00176   | COG0451    |
| cd00403   | smart00091 | cd00030   | cd03441    |
| cd00173   | COG1609    | cd00992   | pfam05193  |
| cd00031   | pfam00307  | cd00090   | smart00385 |
| cd02869   | cd00919    | pfam00753 | cd00299    |
| cd02042   | cd00159    | cd01911   | cd00130    |
| cd00433   | pfam00227  | pfam00496 | pfam00149  |
| cd00405   | cd00041    | pfam00582 | COG1024    |
| pfam09346 | cd01898    | cd01342   | pfam01636  |
| cd00084   | cd00712    | cd01610   | COG0778    |
| cd00383   | COG0436    | cd00564   | cd00093    |
